# Supplementary material
Source: HighWire-hosted journal article supplement (https://jnis.bmj.com/highwire/filestream/171046/field_highwire_adjunct_files/0/neurintsurg-2022-018644supp001_data_supplement.pdf)
Supplement: neurintsurg-2022-018644supp001_data_supplement.pdf [file neurintsurg-2022-018644supp001_data_supplement.pdf]

## **SUPPLEMENTAL MATERIAL**

### **New Concept in Neurovascular Navigation: Technical Description and Preclinical Experience with the Bendit 17 and Bendit 21 Microcatheters in a Rabbit Aneurysm Model**

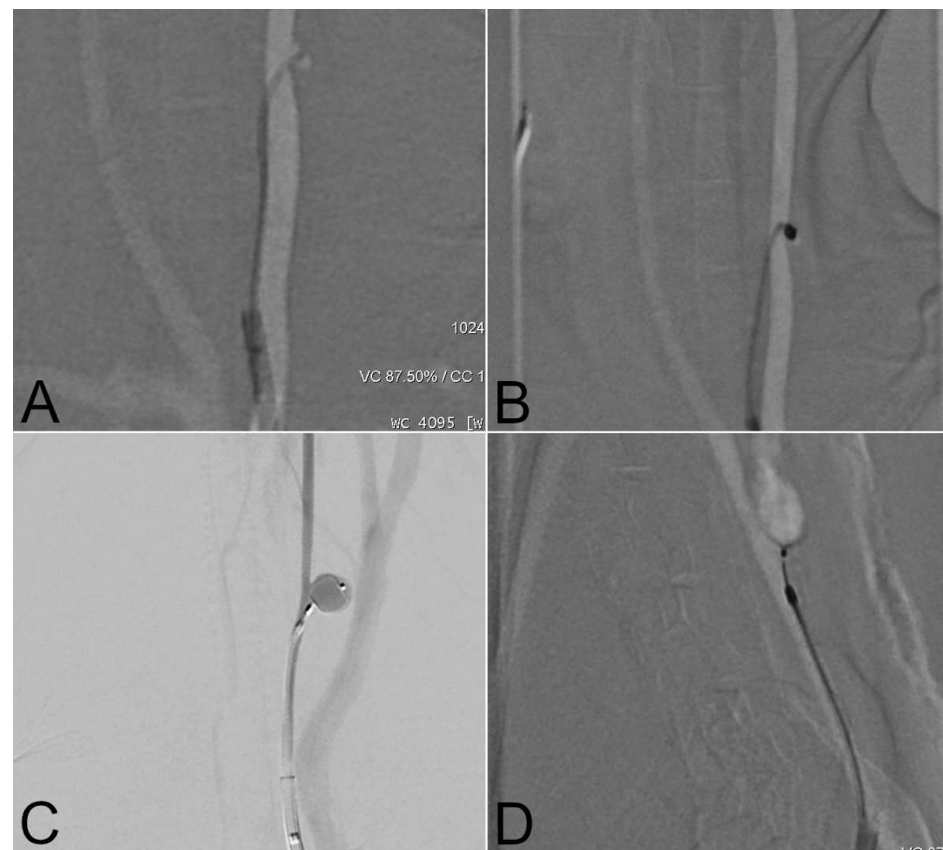

**Supplemental Figure 1: Using the Bendit to deploy intrasaccular devices into side-wall aneurysms.** A) Three investigators were able to catheterize this small (under 2 mm) side-wall aneurysm without a guidewire, Bendit 17. B) Bendit 17 used to add coils to a side-wall aneurysm. C) The Bendit 21 used to deploy the WEB 17 (Microvention) intrasaccular device into a side-wall aneurysm. D) The Bendit 21 used to deploy the Contour Neurovascular System (Cerus Endovascular) into a side-wall aneurysm.

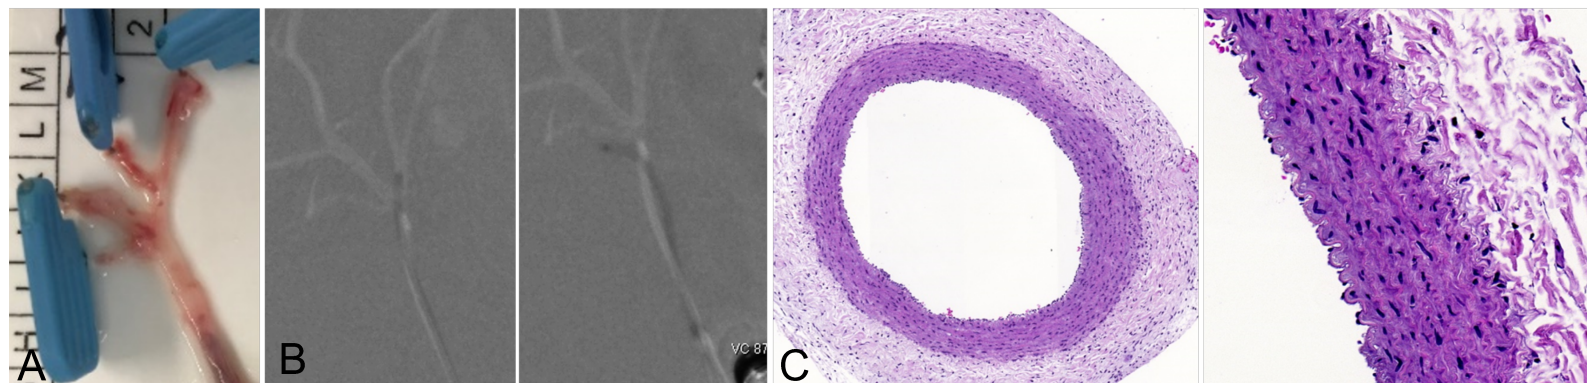

**Supplemental Figure 2: Histology.** A) Photograph of an explanted vessel fixed on a KliniTray™, depicting the carotid bifurcation after circumferential and linear advancement of the catheter. B) Digital subtraction angiography of a vessel *in vivo* during manipulation with the Bendit 17 microcatheter without a guidewire. C) Acute specimen hematoxylin and eosin (H&E) stain of a manipulated vessel section (part of Good Laboratory Practice [GLP] study), showing no evidence of injury.
